# Supplementary material
Source: HighWire-hosted journal article supplement (https://jnm.snmjournals.org/highwire/filestream/94511/field_highwire_adjunct_files/0/126409_Supplemental_Data.pdf)
Supplement: 126409_Supplemental_Data.pdf [file 126409_Supplemental_Data.pdf]

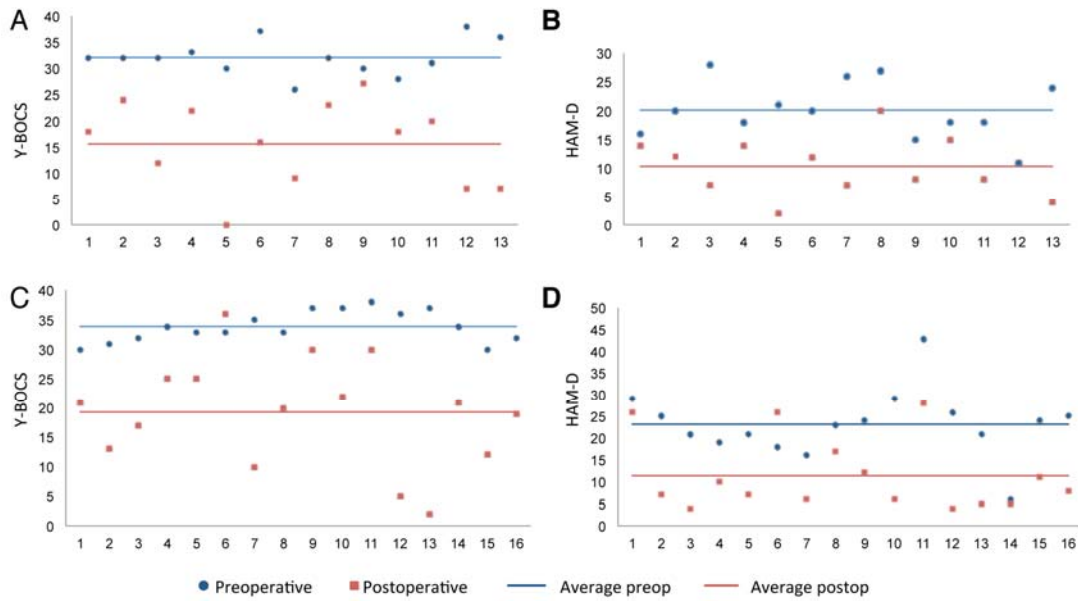

### Supplemental Figure 1

Negative correlation between preoperative metabolism in the DBS group and changes in HAM-D scores ( $P_{\text{height}} \text{ uncorrected} < 0.005$ ).

### Supplemental Table 1

Statistics and global cluster peak coordinates (Talairach coordinates) of negative correlations between preoperative metabolism in the DBS group and changes in HAM-D scores for  $P_{\text{height}} \text{ uncorrected} < 0.005$ .

| $x, y, z$ (mm) | Brain area             | $P_{\text{height}} \text{ uncorr}$ | Cluster extent | $P_{\text{cluster}} \text{ corr(FDR)}$ | $t$ value |
|----------------|------------------------|------------------------------------|----------------|----------------------------------------|-----------|
| 2,26,-12       | Right ACC              | <0.001                             | 215            | 0.066                                  | 6.05      |
| -48,-10,-10    | Left superior temporal | <0.001                             | 399            | 0.009                                  | 5.05      |
